# Supplementary material for: Association between Adverse Childhood Experiences and Multiple Sclerosis in Icelandic Women—A Population-Based Cohort Study
Source: MDPI journal article supplement (doi:10.3390/brainsci12111559), 2022-11-16
Supplement: s1 [file s1]

**Table S1.** ACE-IQ Categories and Questions with Frequency Scoring

| Category of ACE                | Questions                                                                                                                                                 | Required Minimum Frequency |
|--------------------------------|-----------------------------------------------------------------------------------------------------------------------------------------------------------|----------------------------|
| <b>Abuse</b>                   |                                                                                                                                                           |                            |
| Physical                       | Did a parent, guardian or other household member spank, slap, kick, punch or beat you up?                                                                 | Many times                 |
| Emotional                      | Did a parent, guardian or other household member hit or cut you with an object, such as a stick (or cane), bottle, club, knife, whip etc?                 | Many times                 |
| Sexual                         | Did a parent, guardian or other household member yell, scream or swear at you, insult or humiliate you?                                                   | Many times                 |
|                                | Did a parent, guardian or other household member threaten to, or actually, abandon you or throw you out of the house?                                     | Many times                 |
|                                | Did someone touch or fondle you in a sexual way when you did not want them to?                                                                            | Ever                       |
|                                | Did someone make you touch their body in a sexual way when you did not want them to?                                                                      | Ever                       |
|                                | Did someone attempt oral, anal, or vaginal intercourse with you when you did not want them to?                                                            | Ever                       |
|                                | Did someone actually have oral, anal, or vaginal intercourse with you when you did not want them to?                                                      | Ever                       |
| <b>Neglect</b>                 |                                                                                                                                                           |                            |
| Physical                       | Did your parents/guardians not give you enough food even when they could easily have done so?                                                             | Many times                 |
|                                | Were your parents/guardians too drunk or intoxicated by drugs to take care of you?                                                                        | Many times                 |
|                                | Did your parents/guardians not send you to school even when it was available?                                                                             | Many times                 |
| Emotional                      | Did your parents/guardians understand your problems and worries?                                                                                          | Rarely or never            |
|                                | Did your parents/guardians really know what you were doing with your free time when you were not at school or work?                                       | Rarely or never really     |
| <b>Household dysfunction</b>   |                                                                                                                                                           |                            |
| Family violence                | Did you see or hear a parent or household member in your home being yelled at, screamed at, sworn at, insulted or humiliated?                             | Many times                 |
|                                | Did you see or hear a parent or household member in your home being slapped, kicked, punched or beaten up?                                                | A few times or many times  |
|                                | Did you see or hear a parent or household member in your home being hit or cut with an object, such as a stick (or cane), bottle, club, knife, whip etc.? | A few times or many times  |
| Parental separation or divorce | Were your parents ever separated or divorced?                                                                                                             | Yes                        |
|                                | Did your mother, father or guardian die?                                                                                                                  | Yes                        |
| Substance abuse                | Did you live with a household member who was a problem drinker or alcoholic, or misused street or prescription drugs?                                     | Yes                        |

|                               |                                                                                                                               |            |
|-------------------------------|-------------------------------------------------------------------------------------------------------------------------------|------------|
| Incarcerated household member | Did you live with a household member who was ever sent to jail or prison?                                                     | Yes        |
| Mental illness                | Did you live with a household member who was depressed, mentally ill or suicidal?                                             | Yes        |
| <b>Violence</b>               |                                                                                                                               |            |
| Community violence            | Did you see or hear someone being beaten up in real life?                                                                     | Many times |
|                               | Did you see or hear someone being stabbed or shot in real life?                                                               |            |
|                               | Did you see or hear someone being threatened with a knife or gun in real life?                                                |            |
| Bullying                      | How often were you bullied?                                                                                                   | Many times |
| Collective violence           | During the first 18 years of your life, were you exposed to war/collective violence (e.g. from gangs or police)? <sup>a</sup> | Yes/No     |
|                               | Were you forced to go and live in another place due to any of these events?                                                   | Ever       |
|                               | Did you experience the deliberate destruction of your home due to any of these events?                                        |            |
|                               | Were you beaten up by soldiers, police, militia, or gangs?                                                                    |            |
|                               | Was a family member or friend killed or beaten up by soldiers, police, militia, or gangs?                                     |            |

<sup>a</sup> screening question; participants that responded affirmatively received four follow-up questions
